# Supplementary material for: Gamification in Rehabilitation of Patients With Musculoskeletal Diseases of the Shoulder: Scoping Review
Source: PubMed Central journal article supplement (PMC7479582; doi:10.2196/19914), 2020-08-25

# Code tree

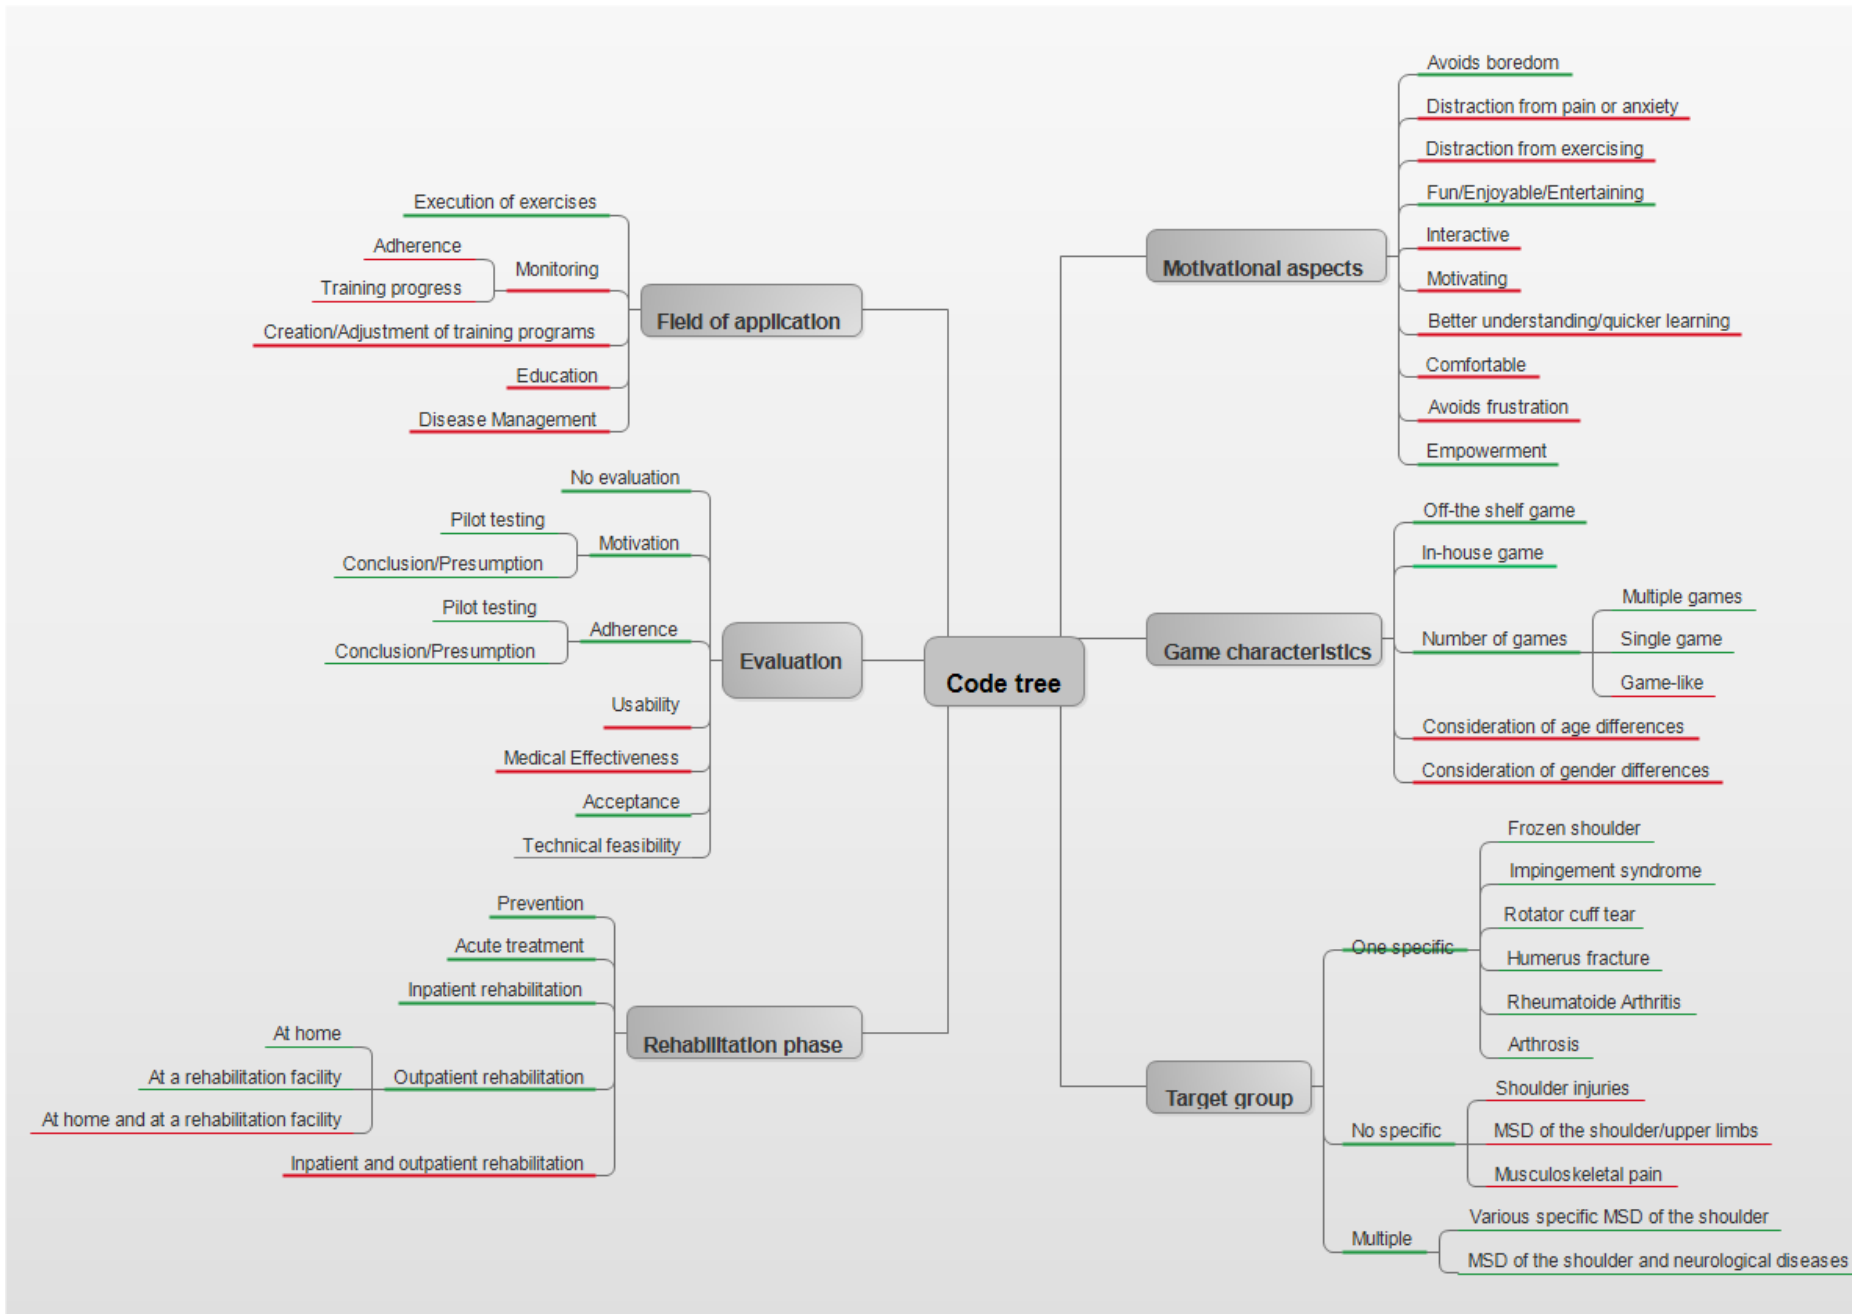

Supplement: games_v8i3e19914_app2.pdf [file games_v8i3e19914_app2.pdf]
