# Supplementary material for: Gamification in Rehabilitation of Patients With Musculoskeletal Diseases of the Shoulder: Scoping Review
Source: PubMed Central journal article supplement (PMC7479582; doi:10.2196/19914), 2020-08-25
Supplement: games_v8i3e19914_app3.pdf [file games_v8i3e19914_app3.pdf]

## Search results grouped by the underlying population

| Titles of articles                                                                                                                                               | First author, year          | Application               |
|------------------------------------------------------------------------------------------------------------------------------------------------------------------|-----------------------------|---------------------------|
| <b>Frozen Shoulder</b>                                                                                                                                           |                             |                           |
| An Interactive Kinect-Based Game Development for Shoulder Injury Rehabilitation                                                                                  | Arif A, 2018                | unstated                  |
| The App Game Interface Design for Frozen Shoulder Rehabilitation                                                                                                 | Chung CE, 2017              | MoMo                      |
| An IMU-compensated Skeletal Tracking System Using Kinect for the Upper Limb                                                                                      | Du YC, 2018                 | unstated                  |
| Intelligent Frozen Shoulder Rehabilitation                                                                                                                       | Huang MC, 2014              | unstated* <sup>1</sup>    |
| The Development of Interactive Shoulder Joint Rehabilitation System Using Virtual Reality in Association with Motion-sensing Technology                          | Yeh SC, 2014                | unstated* <sup>1</sup>    |
| Frozen Shoulder Rehabilitation Using Microsoft Kinect                                                                                                            | Mangal NK, 2017             | unstated                  |
| GEAR: A Mobile Game-Assisted Rehabilitation System                                                                                                               | Rahman M, 2016              | GEAR* <sup>2</sup>        |
| GEAR Analytics: A Clinician Dashboard for a Mobile Game Assisted Rehabilitation System                                                                           | Rahman M, 2016              | GEAR* <sup>2</sup>        |
| <b>Shoulder Impingement Syndrome</b>                                                                                                                             |                             |                           |
| The Sorcerer's Apprentice A Serious Game Aiding Rehabilitation in the Context of Subacromial Impingement Syndrome                                                | Fikar P, 2013               | The Sorcerer's Apprentice |
| Comparison of Virtual Reality Exergaming and Home Exercise Programs in Patients with Subacromial Impingement Syndrome and Scapular Dyskinesia: Short Term Effect | Pekyavas NO, 2017           | commercial (Wii Sports)   |
| Daily Life Self-management and Self-treatment of Musculoskeletal Disorders Through SHOULPHY                                                                      | Lucchesi I, 2018            | SHOULPHY                  |
| Structured Wii Protocol for Rehabilitation of Shoulder Impingement Syndrome: A Pilot Study                                                                       | Rizzo JR, 2017              | commercial (Wii sports)   |
| <b>Shoulder Injuries</b>                                                                                                                                         |                             |                           |
| Serious Rehabilitation Games with Kinect                                                                                                                         | Fernandez-Cervantes V, 2015 | unstated                  |
| Guidance and Movement Correction Based on Therapeutics Movements for Motor Rehabilitation Support Systems                                                        | Da Gama A, 2012             | unstated                  |
| Therapy-led Design of Home-Based Virtual Rehabilitation                                                                                                          | Powell V, 2015              | unstated                  |
| PhysioSonic - Evaluated Movement Sonification as Auditory Feedback in Physiotherapy                                                                              | Vogt K, 2010                | PhysioSonic               |
| A VR-based User Interface for the Upper Limb Rehabilitation                                                                                                      | Shi Y, 2018                 | unstated                  |
| <b>Musculoskeletal Shoulder Pain</b>                                                                                                                             |                             |                           |
| The Design of a Shoulder Rehabilitation Game System                                                                                                              | Chang CM, 2010              | unstated* <sup>3</sup>    |
| An Interactive Game-based Shoulder Wheel System for Rehabilitation                                                                                               | Chang CM, 2012              | unstated* <sup>3</sup>    |
| Designing an Exergaming System for Exercise Bikes Using Kinect Sensors and Google Earth                                                                          | Huang SY, 2017              | unstated                  |
| <b>Musculoskeletal Diseases of the Shoulder/Upper Limbs in General</b>                                                                                           |                             |                           |
| Usability Study of a Kinect-Based Rehabilitation Tool for the Upper Limbs                                                                                        | Muñoz GF, 2019              | KineActiv R               |
| Prototype of a Shoulder and Elbow Occupational Health Care Exergame                                                                                              | Nava W, 2015                | unstated                  |

|                                                                                                               |                        |                              |
|---------------------------------------------------------------------------------------------------------------|------------------------|------------------------------|
| Development and Assessment of a Physiotherapy System Based on Serious Games                                   | Symeonidis I, 2016     | PARC                         |
| Adaptive Gameplay and Difficulty Adjustment in a Gamified Upper-Limb Rehabilitation                           | Pinto JF, 2018         | InMotion                     |
| <b>Several Specific Musculoskeletal Diseases of the Shoulder</b>                                              |                        |                              |
| Comparing Outcomes of Kinect Videogame-Based Occupational/Physical Therapy Versus Usual Care                  | Dahl-Popolizio S, 2014 | unstated                     |
| Assistance System for Rehabilitation and Valuation of Motor Skills                                            | Quevedo WX, 2017       | unstated                     |
| <b>Musculoskeletal Diseases and Others</b>                                                                    |                        |                              |
| Alpha Testing of the Rapid Recovery Kayaking-based Exergame                                                   | Shewaga R, 2015        | Rapid Recovery* <sup>4</sup> |
| Rapid Recovery: A Kayaking-based Exergame for Shoulder Rehabilitation and Physical Fitness                    | Shroeder B, 2014       | Rapid Recovery* <sup>4</sup> |
| A Wearable Rehabilitation Game Controller Using IMU Sensor                                                    | Yin ZX, 2018           | unstated                     |
| Evaluation of Virtual Reality Therapy in Augmenting the Physical and Cognitive Rehabilitation of War Veterans | Wiederhold BK, 2006    | commercial                   |
| A Low Cost Virtual Reality System for Rehabilitation of Upper Limb                                            | Budziszewski P, 2013   | Unstated                     |

---

(\* = articles describing the same application)
